# Supplementary material
Source: PubMed Central journal article supplement (PMC7007375)
Supplement: NIHMS1537588-supplement-1.pdf [file NIHMS1537588-supplement-1.pdf]

| <b>Supplemental Table: Incretin Responses</b> |                          |                          |                             |                            |
|-----------------------------------------------|--------------------------|--------------------------|-----------------------------|----------------------------|
|                                               | <b>Hypoglycemia [-]</b>  |                          | <b>Hypoglycemia<br/>[+]</b> | <b>Overall<br/>p-value</b> |
|                                               | <b><i>NGT (n=11)</i></b> | <b><i>AGT (n=14)</i></b> | <b>(n=9)</b>                |                            |
| <b>GLP-1 (pmol·min/L)</b>                     |                          |                          |                             |                            |
| Incremental AUC <sub>30 min</sub>             | 61 ± 71                  | 67±88                    | 47 ± 50                     | 0.04                       |
| Incremental AUC <sub>180 min</sub>            | 379 ± 354                | 312 ± 316                | 627 ± 556                   | <0.001                     |
| <b>GIP (pg·min/mL)</b>                        |                          |                          |                             |                            |
| Incremental AUC <sub>30 min</sub>             | 1002±738                 | 1048±710                 | 1432±2363                   | 0.01                       |
| Incremental AUC <sub>180 min</sub>            | 22752±12016              | 18504 ± 6835             | 21130±15133                 | 0.55                       |
